# Supplementary material for: Deletion or Inhibition of NOD1 Favors Plaque Stability and Attenuates Atherothrombosis in Advanced Atherogenesis
Source: MDPI journal article supplement (doi:10.3390/cells9092067), 2020-09-10
Supplement: s1 [file s1]

## SUPPLEMENTAL MATERIAL

### Deletion or inhibition of NOD1 favours plaque stability and attenuates atherothrombosis in advanced atherogenesis

Silvia González-Ramos<sup>1,2,\*,\$</sup>, PhD; Victoria Fernández-García<sup>1,2,\$</sup>, MSc; Miriam Recalde<sup>1</sup>, MSc; Cristina Rodríguez<sup>2,3</sup>, PhD; José Martínez-González<sup>2,4</sup>, PhD; Vicente Andrés<sup>2,5</sup>, PhD; Paloma Martín-Sanz<sup>1,2</sup>, PhD; Lisardo Boscá<sup>1,2,\*</sup>, PhD

<sup>1</sup>*Instituto de Investigaciones Biomédicas Alberto Sols (CSIC-UAM), Madrid, Spain;*

<sup>2</sup>*Centro de Investigación Biomédica en Red en Enfermedades Cardiovasculares (CIBERCV), Madrid, Spain;*

<sup>3</sup>*Institut de Recerca del Hospital de la Santa Creu i Sant Pau-Programa ICCV, IIB Sant Pau, Barcelona, Spain;*

<sup>4</sup>*Instituto de Investigaciones Biomédicas de Barcelona (CSIC-IIBB), IIB Sant Pau, Barcelona, Spain;*

<sup>5</sup>*Centro Nacional de Investigaciones Cardiovasculares (CNIC), Madrid, Spain.*

**Running title:** NOD1 deficiency promotes atheroma stability

#### Address correspondence to:

Lisardo Boscá or Silvia González-Ramos  
Instituto de Investigaciones Biomédicas Alberto Sols  
C/Arturo Duperier, 4  
28029 Madrid  
Phone +34-(0)91-497-2747 or -5345  
Email lbsoca@iib.uam.es or sgramos@iib.uam.es

Supplementary Figures

a

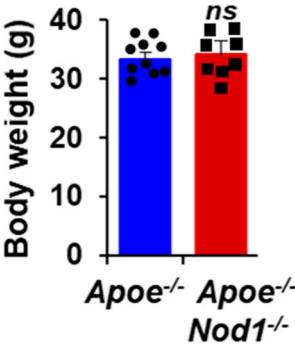

b

| mg/dL         | <i>Apoe</i> <sup>-/-</sup> | <i>Apoe</i> <sup>-/-</sup> <i>Nod1</i> <sup>-/-</sup> |
|---------------|----------------------------|-------------------------------------------------------|
| Triglycerides | 118.1 ± 2.3                | 112 ± 4.2                                             |
| LDL           | 237.1 ± 4.6                | 244.6 ± 6.4                                           |
| HDL           | 101.1 ± 4.5                | 103.6 ± 4.4                                           |
| Total Cho.    | 372.1 ± 3.4                | 382.6 ± 8.1                                           |
| Free Cho.     | 267.6 ± 6.7                | 279.9 ± 8.8                                           |

**Figure S1. HFD-induced body weight increase and lipid profile changes in *Apoe*<sup>-/-</sup> mice are not mediated by *Nod1*.** (a) Body weight in *Apoe*<sup>-/-</sup> (*n*=10) and *Apoe*<sup>-/-</sup>*Nod1*<sup>-/-</sup> (*n*=8) mice after 16 weeks on a HFD. (b) Serum concentration of triglyceride (TGA), high-density lipoproteins (HDL), low-density lipoproteins (LDL), total cholesterol (TCHO) and free cholesterol (FCHO) in the same cohort of mice. Data is represented as mean ± s.e.m. of the indicated number (*n*) of repeats. **ns**; Non-significant by Student's *t* test.

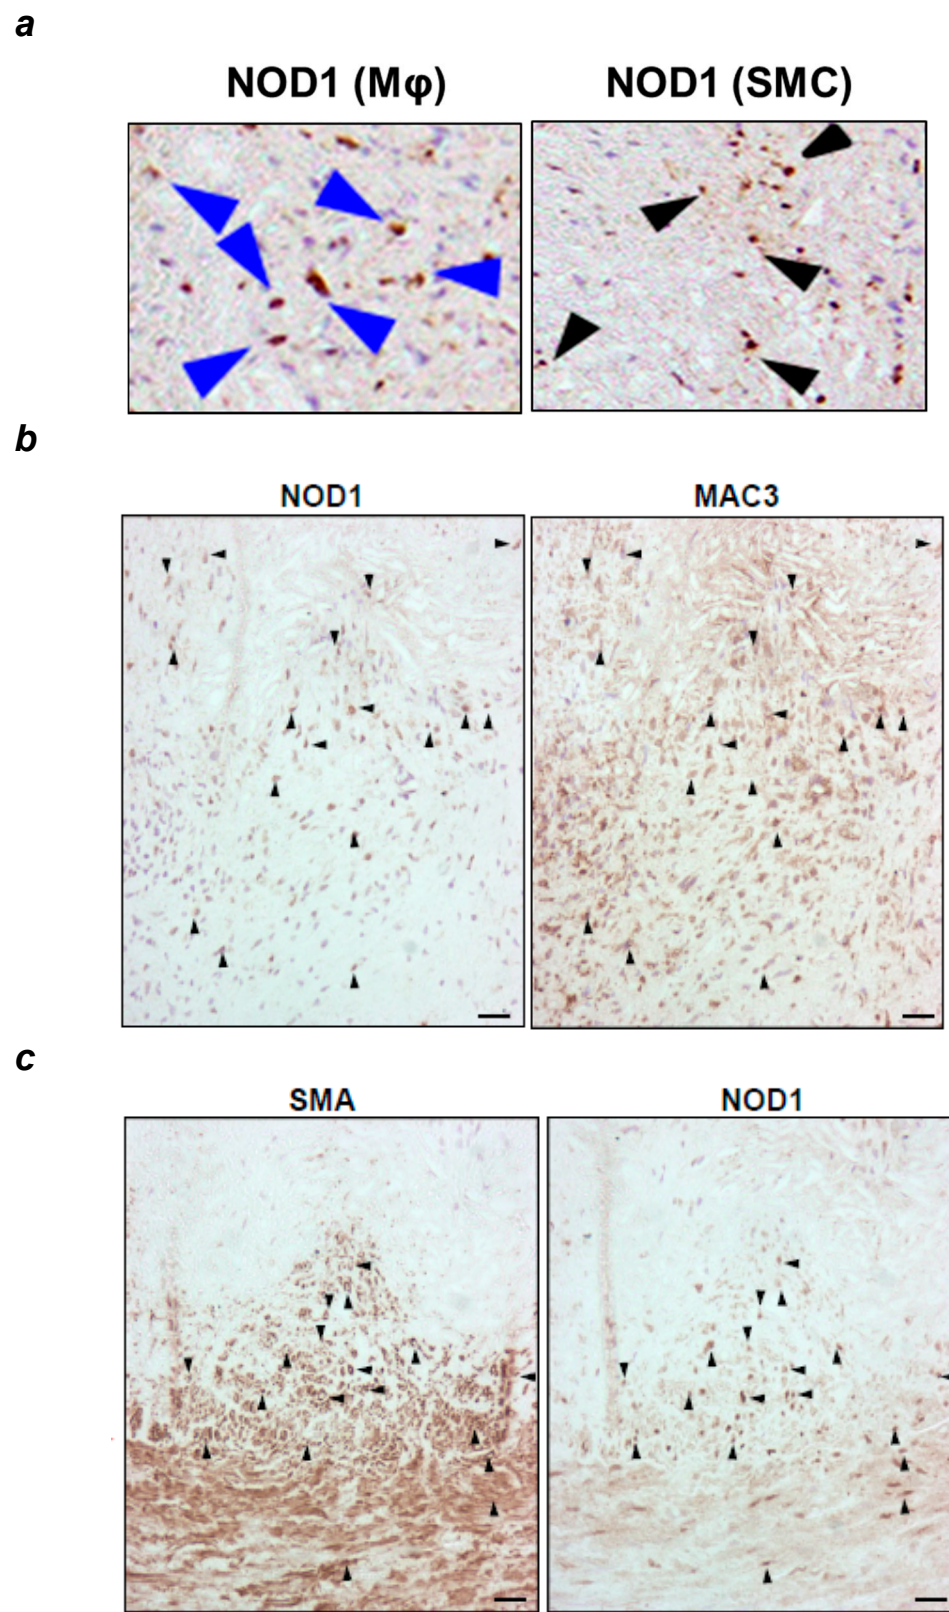

**Figure S2. Inset of NOD1 from atherogenic human coronary arteries (from Fig. 1c) and NOD1 abundance in consecutive sections of human atherosclerotic coronary arteries presenting cholesterol crystals. (a)** Amplification of atherogenic sections from Fig. 1c. **(b)** NOD1 co-localises with macrophage-rich areas (Mac3<sup>+</sup>-cells) in the media and intima of atherosclerotic human arteries. **(c)** Representative images showing the immunohistochemical analysis of SMA and NOD1. Blue arrows point to NOD1<sup>+</sup> cells in macrophages; black arrows point out NOD1<sup>+</sup> cells in the smooth muscle cells.

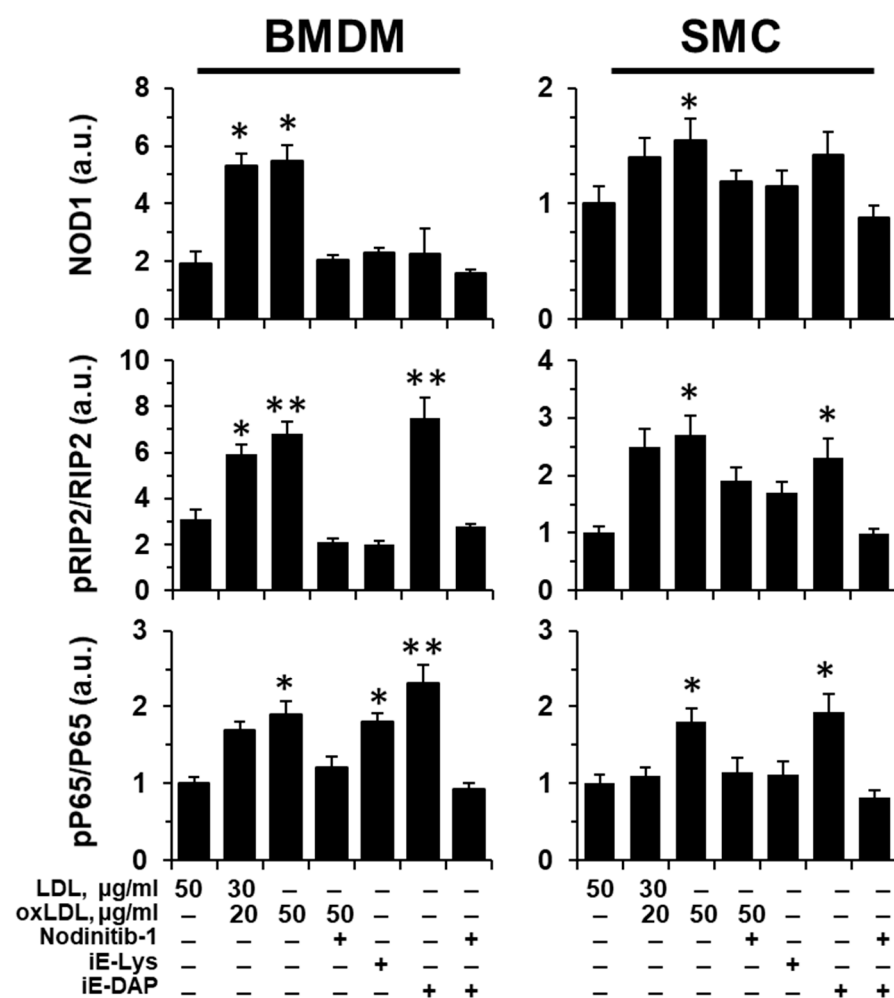

**Figure S3. Quantification of the immunoblots shown in Fig. 1d.** Analysis of NOD1, pRIP2/RIP2, pP65/P65 in *Wt* BMDM ( $n=6$ ) and SMC ( $n=4$ ) pre-treated with the NOD1 inhibitor Nodinitib-1 and/or stimulated with native LDL (as control for lipid load in the medium), oxLDL, c12-iE-DAP (an agonist for NOD1) and iE-Lys (an iE-DAP analogue that fails to activate NOD1) and c12-iE-DAP (an agonist for NOD1) for 24h or 48h, respectively. Protein levels were normalized to tubulin. Data are represented as mean  $\pm$  s.e.m. of the indicated number ( $n$ ) of independent experiments. \* $P < 0.05$ , \*\* $P < 0.01$  vs. the LDL condition by Student's  $t$  test. a.u., arbitrary units.

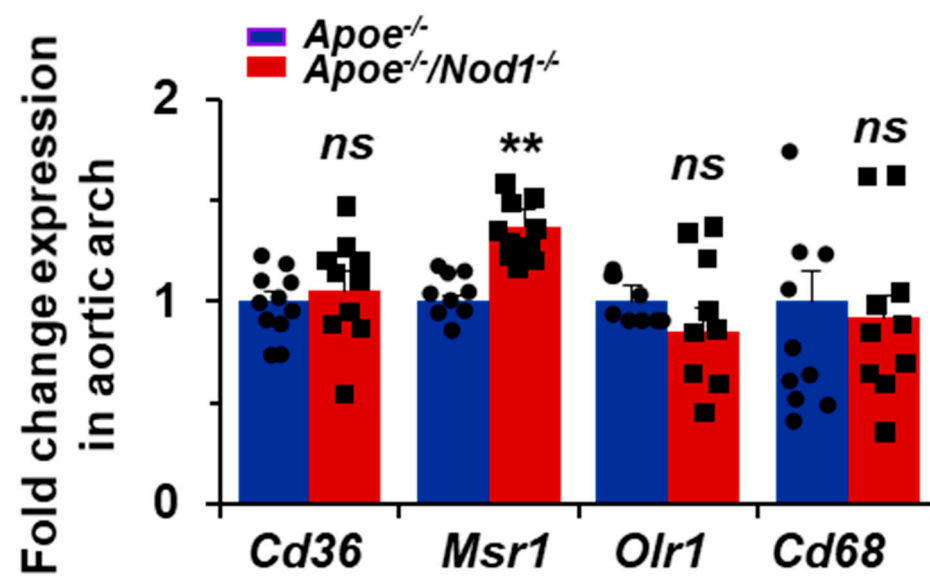

**Figure S4. mRNA levels of scavenger receptors in athero-prone *Apoe*<sup>-/-</sup> mice in the presence and absence of *Nod1*.** Quantitative PCR analysis of the scavenger receptors *Cd36*, mouse scavenger receptor 1 (*Msr1*), oxidised low-density receptor 1 (*Olr1*) and the low-density lipoprotein receptor *Cd68* expression in the aortic arch of *Apoe*<sup>-/-</sup> (*n*=10) and *Apoe*<sup>-/-</sup>/*Nod1*<sup>-/-</sup> (*n*=10) mice after 16 weeks on HFD. mRNA levels were normalised to *mRplp0* expression. Data are represented as mean ± s.e.m. of the indicated number (*n*) of repeats. \*\**P* < 0.01 vs. *Apoe*<sup>-/-</sup> by Student's *t* test. **ns**; Non-significant by Student's *t* test.

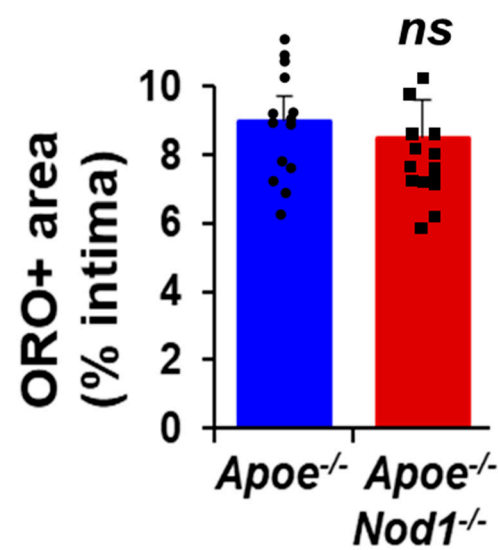

**Figure S5. *Nod1* does not affect lipid atherosclerotic area in *Apoe*<sup>-/-</sup> mice.** Quantification of positive Oil Red O (ORO) lesion area in the semilunar valve cups of *Apoe*<sup>-/-</sup> (*n*=13) and *Apoe*<sup>-/-</sup>/*Nod1*<sup>-/-</sup> (*n*=13) mice fed HFD for 16 weeks. Data are represented as mean ± s.e.m. of the indicated number (*n*) of repeats. Non-significant by Mann-Whitney U test. **ns**; Non-significant by Student's *t* test.

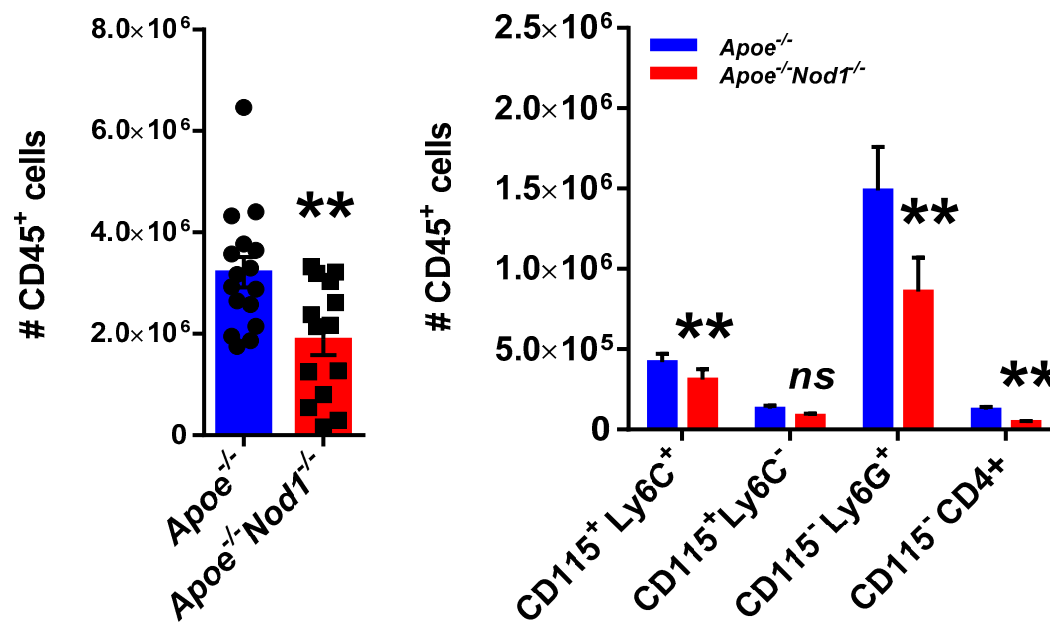

**Figure S6. *Apoe*<sup>-/-</sup>*Nod1*<sup>-/-</sup> mice present less leukocyte cell content in blood comparing to their *Apoe*<sup>-/-</sup> counterparts.** Quantification of leukocyte, monocyte/macrophage, neutrophil and CD4<sup>+</sup> lymphocyte cells in blood collected from *Apoe*<sup>-/-</sup> (*n*=16) and *Apoe*<sup>-/-</sup>*Nod1*<sup>-/-</sup> (*n*=16) mice (16 weeks HFD-fed), performed by flow cytometry. Data are represented as mean ± s.e.m. of the indicated number (*n*) of repeats. \**P* < 0.05, \*\**P* < 0.01 vs. *Apoe*<sup>-/-</sup> by Student's *t* test. *ns*; Non-significant by Student's *t* test.

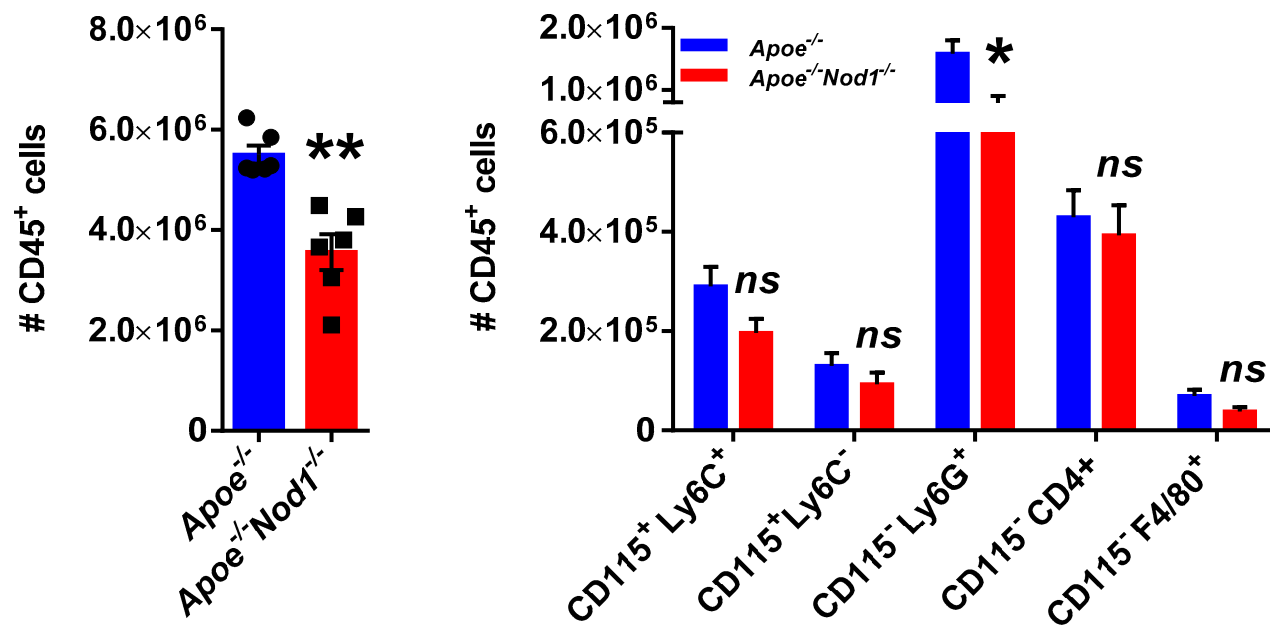

**Figure S7. *Nod1* inactivation in mice results in a lower number of total CD45<sup>+</sup> cells and neutrophils in spleen, while there are no significant changes in other white cells subsets.** Leukocyte, monocyte/macrophage, neutrophil and CD4<sup>+</sup> lymphocyte number of cells was assessed in the spleen obtained from *Apoe*<sup>-/-</sup> (*n*=6) and *Apoe*<sup>-/-</sup>*Nod1*<sup>-/-</sup> (*n*=6) mice (16 weeks HFD-fed), using flow cytometry techniques. Data are represented as mean ± s.e.m. of the indicated number (*n*) of repeats. \**P* < 0.05, \*\**P* < 0.01 vs. *Apoe*<sup>-/-</sup> by Student's *t* test. *ns*; Non-significant by Student's *t* test.

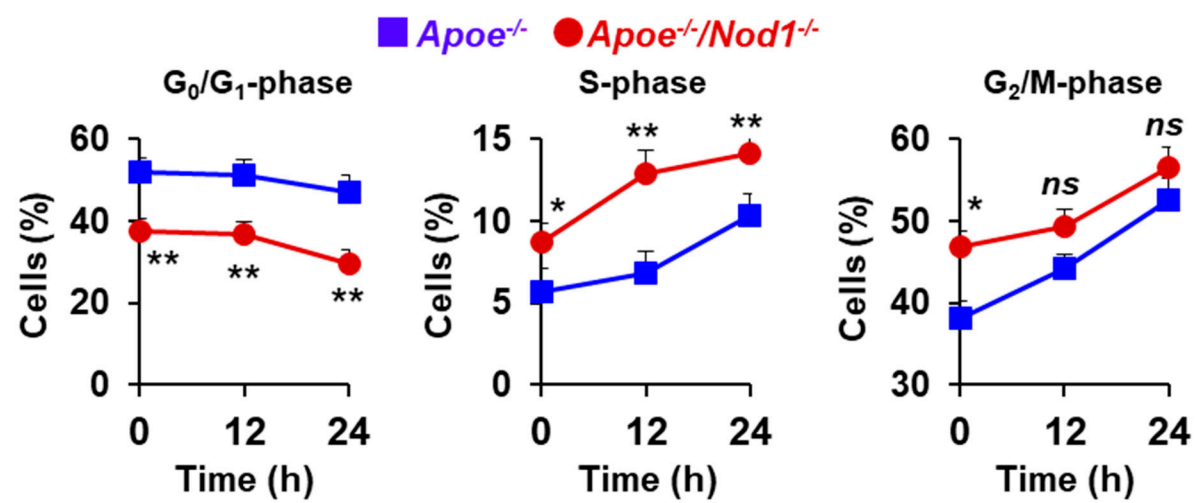

**Figure S8. *Nod1* inactivation in cultured SMCs promotes faster cell cycle entry into S-phase.** Cell cycle profile of primary vascular SMCs from *Apoe*<sup>-/-</sup> (*n*=10) and *Apoe*<sup>-/-</sup>/*Nod1*<sup>-/-</sup> (*n*=10) mice was assessed in a flow cytometer by propidium iodide staining. Cells were synchronised in G<sub>0</sub>/G<sub>1</sub> phase by 72-h serum deprivation and restimulated for the indicated times. Results are average representative of three independent experiments. Data are represented as mean ± s.e.m. of the indicated number (*n*) of repeats. \**P* < 0.05, \*\**P* < 0.01 vs. *Apoe*<sup>-/-</sup> by Student's *t* test. *ns*; Non-significant by Student's *t* test.

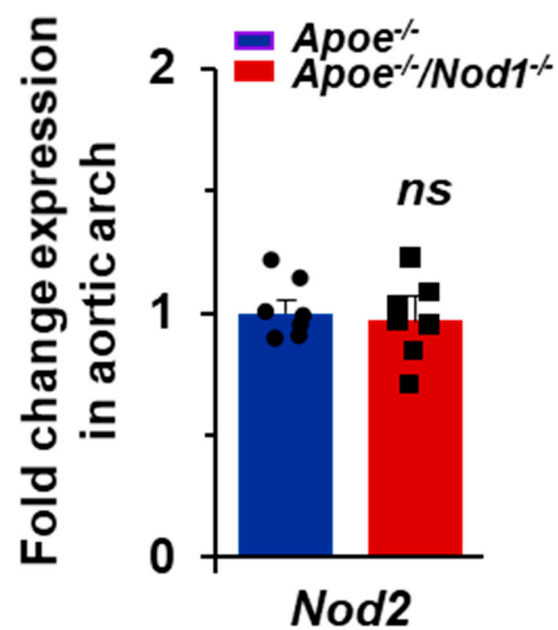

**Figure S9. mRNA levels of *Nod2* in the aortic arch of athero-prone *Apoe*<sup>-/-</sup> mice in the presence and absence of *Nod1*.** Quantitative PCR analysis of *Nod2* expression in the aortic arch of *Apoe*<sup>-/-</sup> (*n*=7) and *Apoe*<sup>-/-</sup>/*Nod1*<sup>-/-</sup> (*n*=7) mice after 16 weeks on HFD. mRNA levels were normalised to *mRplp0* expression. Data are represented as mean ± s.e.m. of the indicated number (*n*) of repeats. *ns*; Non-significant by Student's *t* test.
